# Supplementary material
Source: Research Square preprint supplement (doi:10.21203/rs.3.rs-10007020/v1)
Supplement: Supplementary file 1 [file 4a9faf9ee50db78a36453410.docx]

**Supplementary Table 1.** Description of plots placed into four levels of fire severity.

| Wildfire severity | Description |
| --- | --- |
| Unburned | Plant parts green and unaltered, no direct effect from heat. |
| Low severity wildfire | Tree canopy largely unaltered. Ground surface may be black with recognizable fine fuels remaining on surface. Ash is thin or patchy. |
| Moderate severity wildfire | Tree canopy is mostly scorched, but needles/leaves typically remain on branches. Thin layer of black to gray ash with recognizable litter beneath it. Shrub litter will be mostly consumed. |
| High severity wildfire | Tree canopy is completely consumed; few to no needles or leaves remain on branches. Thick, 1- to 3-inch (3- to 6-cm or more) layer of powdery gray or white ash covers the ground. Very little to no effective ground cover remains. Shrub litter is completely consumed. |

**Supplementary Table 2.** Information of microbial functional genes involved in the C, N, and P cycling processes identified.

| **KEGG orthology number** | **Gene name** | **Description** |
| --- | --- | --- |
| **C degradation** | | |
| **Cellulose** | | |
| K01223 | *bglA* | 6-phospho-beta-glucosidase [EC:3.2.1.86] |
| K05350 | *bglB* | beta-glucosidase [EC:3.2.1.21] |
| K05349 | *bglX* | beta-glucosidase [EC:3.2.1.21] |
| K19668 | *cbhA* | cellulose 1,4-beta-cellobiosidase [EC:3.2.1.91] |
| K01222 | *celF* | 6-phospho-beta-glucosidase [EC:3.2.1.86] |
| **Chitin** | | |
| K01183 | *chitinase* | chitinase [EC:3.2.1.14] |
| K20547 | *CHIB* | basic endochitinase B [EC:3.2.1.14] |
| K01452 | *chitin deacetylase* | chitin deacetylase [EC:3.5.1.41] |
| K01443 | *nagA* | N-acetylglucosamine-6-phosphate deacetylase [EC:3.5.1.25] |
| K01207 | *nagZ* | beta-N-acetylhexosaminidase [EC:3.2.1.52] |
| **Hemicellulose** | | |
| K01209 | *abfA* | alpha-L-arabinofuranosidase [EC:3.2.1.55] |
| K01191 | *MAN2C1* | alpha-mannosidase [EC:3.2.1.24] |
| K01218 | *nplT* | mannan endo-1,4-beta-mannosidase [EC:3.2.1.78] |
| K01805 | *xylA* | xylose isomerase [EC:5.3.1.5] |
| **Lignin** | | |
| K07104 | *catE* | catechol 2,3-dioxygenase [EC:1.13.11.2] |
| K04618 | *GAOA* | galactose oxidase [EC:1.1.3.9] |
| K04100 | *ligA* | protocatechuate 4,5-dioxygenase, alpha chain [EC:1.13.11.8] |
| K00422 | *phenoloxidase* | polyphenol oxidase [EC:1.10.3.1] |
| **Pectin** | | |
| K01804 | *araA* | L-arabinose isomerase [EC:5.3.1.4] |
| K01728 | *pel* | pectate lyase [EC:4.2.2.2] |
| K01184 | *pgl* | polygalacturonase [EC:3.2.1.15] |
| **Starch** | | |
| K01176 | *amyA* | alpha-amylase [EC:3.2.1.1] |
| K01178 | *glucoamylase* | glucoamylase [EC:3.2.1.3] |
| K01214 | *iam* | isoamylase [EC:3.2.1.68] |
| K00705 | *malQ* | 4-alpha-glucanotransferase [EC:2.4.1.25] |
| K01187 | *malZ* | alpha-glucosidase [EC:3.2.1.20] |
| **N cycling** | | |
| **Assimilatory nitrate reduction (ANRA)** | | |
| K00367 | *narB* | ferredoxin-nitrate reductase [EC:1.7.7.2] |
| K00372 | *nasA* | assimilatory nitrate reductase catalytic subunit [EC:1.7.99.-] |
| K00360 | *nasB* | assimilatory nitrate reductase electron transfer subunit [EC:1.7.99.-] |
| K15578 | *nasD* | nitrate/nitrite transport system ATP-binding protein [EC:7.3.2.4] |
| K00366 | *nirA* | ferredoxin-nitrite reductase [EC:1.7.7.1] |
| **Denitrification** | | |
| K00370 | *narG* | nitrate reductase / nitrite oxidoreductase, alpha subunit [EC:1.7.5.1 1.7.99.-] |
| K00371 | *narH* | nitrate reductase / nitrite oxidoreductase, beta subunit [EC:1.7.5.1 1.7.99.-] |
| K00374 | *narI* | nitrate reductase gamma subunit [EC:1.7.5.1 1.7.99.-] |
| K00368 | *nirK* | nitrite reductase (NO-forming) [EC:1.7.2.1] |
| K15864 | *nirS* | nitrite reductase (NO-forming) / hydroxylamine reductase [EC:1.7.2.1 1.7.99.1] |
| K04561 | *norB* | nitric oxide reductase subunit B [EC:1.7.2.5] |
| K02305 | *norC* | nitric oxide reductase subunit C |
| K00376 | *nosZ* | nitrous-oxide reductase [EC:1.7.2.4] |
| **Dissimilatory nitrate reduction (DNRA)** | | |
| K02567 | *napA* | nitrate reductase (cytochrome) [EC:1.9.6.1] |
| K02568 | *napB* | nitrate reductase (cytochrome), electron transfer subunit |
| K00362 | *nirB* | nitrite reductase (NADH) large subunit [EC:1.7.1.15] |
| K00363 | *nirD* | nitrite reductase (NADH) small subunit [EC:1.7.1.15] |
| K03385 | *nrfA* | nitrite reductase (cytochrome c-552) [EC:1.7.2.2] |
| K15876 | *nrfH* | cytochrome c nitrite reductase small subunit |
| **Nitrification** | | |
| K10944 | *amoA* | methane monooxygenase subunit A [EC:1.14.18.3] |
| K10945 | *amoB* | methane/ammonia monooxygenase subunit B |
| K10946 | *amoC* | methane/ammonia monooxygenase subunit C |
| K10535 | *hao* | hydroxylamine dehydrogenase [EC:1.7.2.6] |
| **Nitrogen degradation** | | |
| K00261 | *gdhA* | glutamate dehydrogenase (NAD(P)+) [EC:1.4.1.3] |
| K00117 | *gdhB* | quinoprotein glucose dehydrogenase [EC:1.1.5.2] |
| K01915 | *glnA* | glutamine synthetase [EC:6.3.1.2] |
| K00284 | *gltB* | glutamate synthase (ferredoxin) [EC:1.4.7.1] |
| K00266 | *gltD* | glutamate synthase (NADPH) small chain [EC:1.4.1.13] |
| K01428 | *ureC* | urease subunit alpha [EC:3.5.1.5] |
| **Nitrogen Fixation** | | |
| K02584 | *nifA* | Nif-specific regulatory protein |
| K02588 | *nifH* | nitrogenase iron protein NifH |
| K04487 | *nifS* | cysteine desulfurase [EC:2.8.1.7] |
| K02594 | *nifV* | homocitrate synthase NifV [EC:2.3.3.14] |
| **P cycling** | | |
| **Inorganic P-solubilization** | | |
| K00117 | *gcd* | quinoprotein glucose dehydrogenase [EC:1.1.5.2] |
| K01507 | *ppa* | inorganic pyrophosphatase [EC:3.6.1.1] |
| K00937 | *ppk1* | polyphosphate kinase [EC:2.7.4.1] |
| K01524 | *ppx* | exopolyphosphatase / guanosine-5'-triphosphate,3'-diphosphate pyrophosphatase [EC:3.6.1.11 3.6.1.40] |
| **Organic P-mineralization** | | |
| K01093 | *appA* | 4-phytase / acid phosphatase [EC:3.1.3.26 3.1.3.2] |
| K19670 | *phnA* | phosphonoacetate hydrolase [EC:3.11.1.2] |
| K06166 | *phnG* | alpha-D-ribose 1-methylphosphonate 5-triphosphate synthase subunit PhnG [EC:2.7.8.37] |
| K06165 | *phnH* | alpha-D-ribose 1-methylphosphonate 5-triphosphate synthase subunit PhnH [EC:2.7.8.37] |
| K06164 | *phnI* | alpha-D-ribose 1-methylphosphonate 5-triphosphate synthase subunit PhnI [EC:2.7.8.37] |
| K06163 | *phnJ* | alpha-D-ribose 1-methylphosphonate 5-phosphate C-P lyase [EC:4.7.1.1] |
| K05780 | *phnL* | alpha-D-ribose 1-methylphosphonate 5-triphosphate synthase subunit PhnL [EC:2.7.8.37] |
| K06162 | *phnM* | alpha-D-ribose 1-methylphosphonate 5-triphosphate diphosphatase [EC:3.6.1.63] |
| K05774 | *phnN* | LIM domain kinase 2 [EC:2.7.11.1] |
| K09994 | *phnO* | (aminoalkyl)phosphonate N-acetyltransferase [EC:2.3.1.280] |
| K06167 | *phnP* | phosphoribosyl 1,2-cyclic phosphate phosphodiesterase [EC:3.1.4.55] |
| K03430 | *phnW* | 2-aminoethylphosphonate-pyruvate transaminase [EC:2.6.1.37] |
| K05306 | *phnX* | phosphonoacetaldehyde hydrolase [EC:3.11.1.1] |
| K01077 | *phoA* | alkaline phosphatase [EC:3.1.3.1] |
| K09474 | *phoN* | acid phosphatase (class A) [EC:3.1.3.2] |
| K01083 | *phy* | 3-phytase [EC:3.1.3.8] |
| K01126 | *ugpQ* | glycerophosphoryl diester phosphodiesterase [EC:3.1.4.46] |
| **P-starvation response regulation** | | |
| K07657 | *phoB* | two-component system, OmpR family, phosphate regulon response regulator PhoB |
| K07660 | *phoP* | two-component system, OmpR family, response regulator PhoP |
| K07636 | *phoR* | two-component system, OmpR family, phosphate regulon sensor histidine kinase PhoR [EC:2.7.13.3] |
| **P-uptake and transport** | | |
| K01126 | *glpQ* | glycerophosphoryl diester phosphodiesterase [EC:3.1.4.46] |
| K02041 | *phnC* | phosphonate transport system ATP-binding protein [EC:7.3.2.2] |
| K02042 | *phnE* | phosphonate transport system permease protein |
| K02038 | *pstA* | phosphate transport system permease protein |
| K02036 | *pstB* | phosphate transport system ATP-binding protein [EC:7.3.2.1] |
| K02037 | *pstC* | phosphate transport system permease protein |
| K05814 | *ugpA* | sn-glycerol 3-phosphate transport system permease protein |
| K05813 | *ugpB* | sn-glycerol 3-phosphate transport system substrate-binding protein |
| K05816 | *ugpC* | sn-glycerol 3-phosphate transport system ATP-binding protein [EC:7.6.2.10] |
| K05815 | *ugpE* | sn-glycerol 3-phosphate transport system permease protein |

**Supplementary Table 3.** PERMANOVA results showing the effects of Fire, Depth, and their interaction on carbon, nitrogen, and phosphorus gene composition. Significance was determined at *p* < 0.05 using Bray-Curtis dissimilarity.

| Functional Gene | Variable | Sum of Sqs | R2 | F | Pr (>F) |
| --- | --- | --- | --- | --- | --- |
| C degradation | Fire | 0.01 | 0.12 | 6.76 | 0.001 |
| Depth | 0.03 | 0.47 | 39.46 | 0.001 |
| Fire x Depth | 0.02 | 0.26 | 7.37 | 0.001 |
| N cycling | Fire | 0.02 | 0.12 | 7.46 | 0.001 |
| Depth | 0.08 | 0.60 | 56.48 | 0.001 |
| Fire x Depth | 0.02 | 0.16 | 4.96 | 0.002 |
| P cycling | Fire | 0.01 | 0.14 | 6.41 | 0.001 |
| Depth | 0.03 | 0.44 | 30.28 | 0.001 |
| Fire x Depth | 0.02 | 0.25 | 5.68 | 0.001 |

**
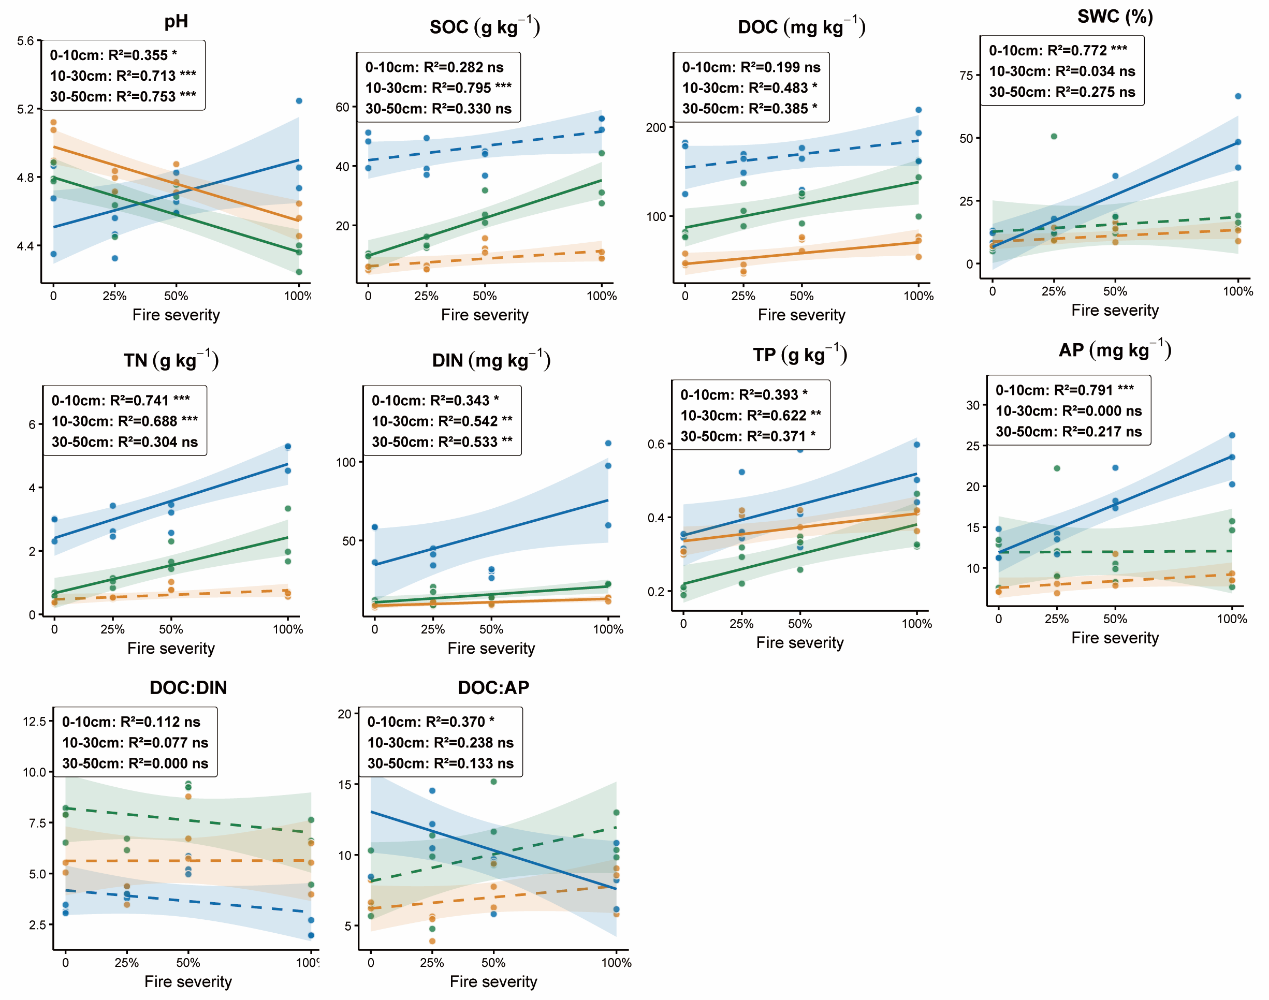
**

**Supplementary Figure 1.** OLS regressions evaluating the responses of various soil properties to increasing wildfire severity in different soil layers. Colored lines represent the regression fits for distinct soil layers. Solid and dashed lines indicate significant (*P* < 0.05) and non-significant relationships, respectively, with shaded areas denoting the 95% confidence intervals. Significance levels: *** *P* < 0.001, ** *P* < 0.01, and * *P* < 0.05. SOC, soil organic C; DOC, dissolved organic C; SWC, soil water content; TN, total N; DIN, Dissolved Inorganic Nitrogen; TP, total P; AP, available P.

**
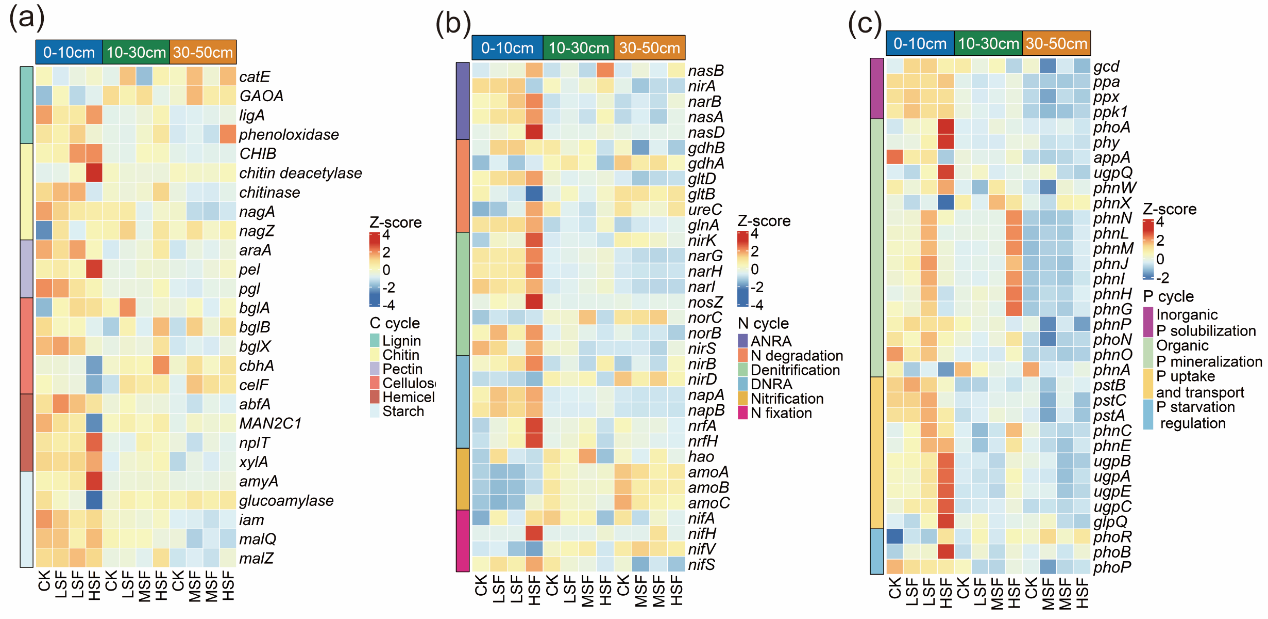
**

**Supplementary Figure 2.** Heatmaps displaying variations in the normalized abundance values (row Z-scored) of functional genes associated with C (a), N (b) and P(c) cycling in the KEGG database were generated from our metagenomic data across all wildfire severity levels. CK: unburned control; LSF: low severity fire; MSF: moderate severity fire; HSF: high severity fire.


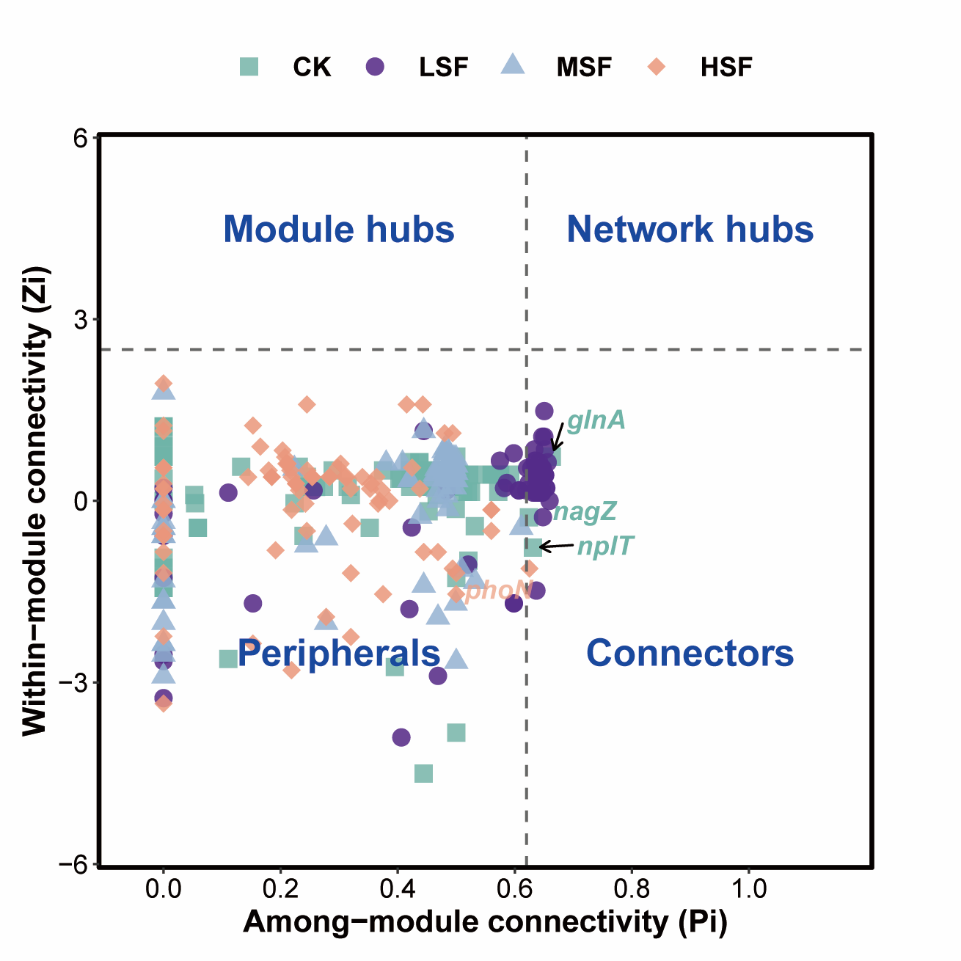


**Supplementary Figure 3.** Zi-Pi plot of functional genes based on module topological traits among different wildfire severity.

**Supplementary Text1: Measurement of soil physicochemical properties**

Following 48 hours of drying at 105°C, the soil water content (SWC) was determined using the gravimetric method. To measure the soil pH, a pH monitor (Thermo Orion-868, Massachusetts, USA) was employed, with a ratio of fresh soil to pure water set at 1:5. The soil organic C (SOC) in the extracts was measured with an automatic total organic carbon analyzer (TOC-VWP, Shimadzu, Japan). Soil dissolved organic C (DOC) was determined by suspending soil in water (1:5 soil-to-water ratio) for 30 minutes, followed by filtration through a 0.45-μm membrane. Soil total nitrogen (TN) and total phosphorus (TP) were determined using a continuous flow analytical system (SEAL Analytical AA3, Nordstedt, Germany) after adding H2SO4 and HClO4-H2SO4 digestion, respectively. Soil available phosphorus (AP) was extracted with sodium bicarbonate and analyzed using molybdenum-antimony colorimetry. Soil NH4+ and NO3− nitrogen were extracted by vigorously shaking the sample with 50 mL of 1.0 mol L-1 KCl for 20 min and were measured using a continuous flow analytical system (SEAL Analytical AA3, Nordstedt, Germany).
